# Supplementary material
Source: Springer Nature journal article supplement (https://www.springermedizin.de/resource/supplementary/12889_2012_4900_MOESM5_ESM.pdf/9493632)

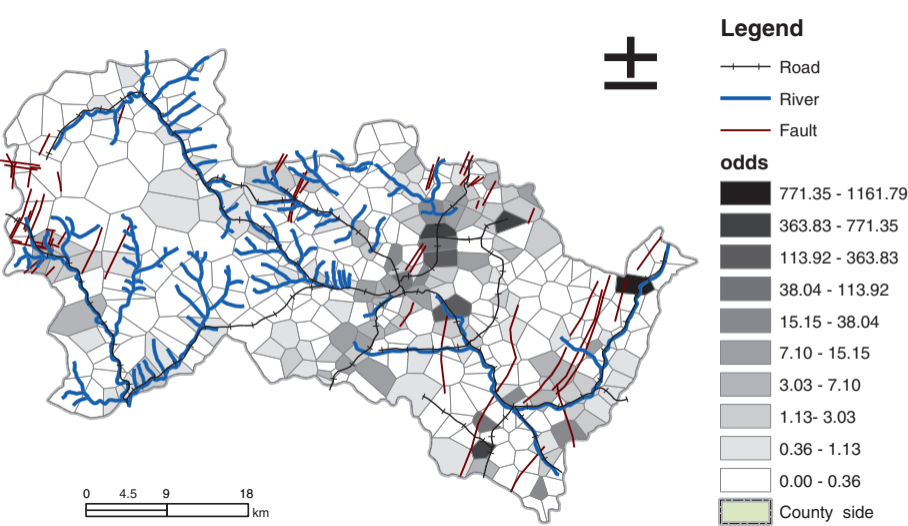

Supplement: MOESM5 [file 9493632]
